# Supplementary material for: Selective catalytic reduction of NO over hierarchical Cu ZSM-5 coated on an alumina foam support
Source: Royal Society of Chemistry journal article supplement (doi:10.1039/d1re00505g), 2022-01-01
Supplement: d1re00505g1.pdf [file d1re00505g1.pdf]

Cite this: DOI: 00.0000/xxxxxxxxxx

## Selective Catalytic Reduction of NO Over Hierarchical Cu ZSM-5 Coated on Alumina Foam Support<sup>†</sup>

Risha Raju,<sup>\*a</sup>, Gomathi N<sup>b</sup>, Prabhakaran K<sup>b</sup>, Kuruvilla Joseph<sup>b</sup> and A. Salih<sup>a</sup>

Table 1 Chemical composition of Na-ZSM-5 sample mixture

| Si/Al ratio | AIP(g) | TEOS (g) | NaOH(g) | TPAOH (g) | H <sub>2</sub> O(g) |
|-------------|--------|----------|---------|-----------|---------------------|
| 10          | 1      | 5.1      | 0.039   | 0.59      | 52.35               |
| 20          | 1      | 10.2     | 0.039   | 0.59      | 52.35               |
| 50          | 0.2    | 5.1      | 0.039   | 0.59      | 52.35               |

Table 2 Geometric characteristics of the samples and correlations for mass transfer and friction factor<sup>1, 2</sup>.

| Material type | Cell Density | Porosity | Dpore (m) | Sv [m <sup>2</sup> /m <sup>3</sup> ] | Mass transfer correlations                      | friction factor     |
|---------------|--------------|----------|-----------|--------------------------------------|-------------------------------------------------|---------------------|
| FeCrAl        | 20PPI        | 0.94     | 1.10e-3   | 1400                                 | Sh = 0.55Re <sup>0.5864</sup> Sc <sup>1/3</sup> | f = 11.12/Re + 0.16 |
| FeCrAl        | 30 PPI       | 0.96     | 0.9e-3    | 2100                                 | Sh = 0.41Re <sup>0.6147</sup> Sc <sup>1/3</sup> | f = 6.66/Re + 0.11  |
| Al            | 10 PPI       | 0.92     | 1.2e-3    | 1800                                 | sh = 1.13Re <sup>0.467</sup> Sc <sup>1/3</sup>  | f = 10.5/Re + 0.13  |
| Al            | 20 PPI       | 0.92     | 0.8e-3    | 2153                                 | Sh = 0.68Re <sup>0.355</sup> Sc <sup>1/3</sup>  | f = 3.66/Re + 0.08  |
| Al            | 40 PPI       | 0.94     | 0.7e-3    | 4300                                 | sh = 0.37Re <sup>0.398</sup> Sc <sup>1/3</sup>  | f = 3.08/Re + 0.08  |

Table 3 Quantification of Cu dispersion in Cu-ZSM-5 foam catalysts

| Samples     | Volume Adsorbed (ml/g) | Metal loading (%) | No of moles of metal on the surface (mmoles/g) | Total moles of metal on the catalyst (mmoles/g) | Metal Dispersion (%) | Active metal surface area (m <sup>2</sup> ) |
|-------------|------------------------|-------------------|------------------------------------------------|-------------------------------------------------|----------------------|---------------------------------------------|
| Cu-ZSM-5-10 | 8.56                   | 0.9               | 3.93                                           | 14.16                                           | 27                   | 15.2                                        |
| Cu-ZSM-5-20 | 16.92                  | 0.8               | 5.82                                           | 12.58                                           | 46                   | 20.4                                        |
| Cu-ZSM-5-50 | 8.52                   | 0.7               | 4.72                                           | 11.01                                           | 42                   | 12.6                                        |

Table 4 Mass transfer and pressure drop correlation<sup>1</sup>

| Material            | Mass transfer correlations                     | Friction factor correlation                    |
|---------------------|------------------------------------------------|------------------------------------------------|
| Cordierite monolith | Sh = 2.696[1+0.139Re.Sc(d/L)] <sup>0.813</sup> | f = 14.23/Re(1+0.045/(L/Dh.Re)) <sup>0.5</sup> |
| Packed bed          | Sh=2+0.6Re <sup>0.5</sup> Sc <sup>1/3</sup>    | Ergun Equation                                 |
| Cu ZSM-5 foam       | Sh=0.47Re <sup>0.7</sup> Sc <sup>1/3</sup>     | f=1.4/Re +0.011                                |

\* E-mail: rajurisha@gmail.com

<sup>a</sup> Department of Aerospace Engineering

<sup>b</sup> Department of Chemistry

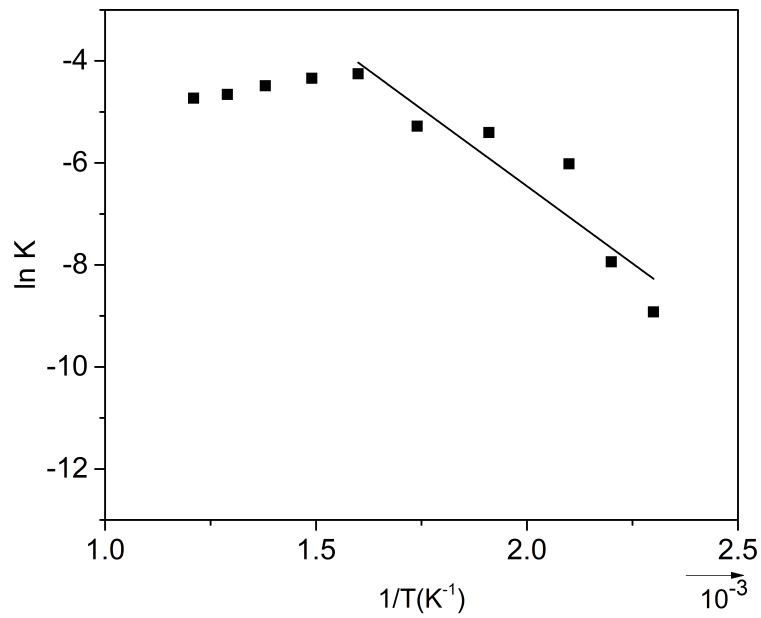

Fig. 1 Reaction rate in Arrhenius coordinates ( $K^{-1}$ ,  $s^{-1}$ ) for Cu ZSM-5-20 deposited on 30 PPI  $\alpha$  alumina foam

## References

- 1 J. Ochonska-Kryca, M. Iwaniszyn, M. Pikatek, P. J. Jodlowski, J. Thomas, A. Kolodziej and J. Lojewska, *Catalysis today*, 2013, **216**, 135–141.
- 2 J. Kryca, M. Iwaniszyn, M. Pikatek, P. J. Jodlowski, R. Jkdrzejczyk, R. Pkedrys, A. Wrobel, J. Lojewska and A. Kolodziej, *Topics in Catalysis*, 2016, **59**, 887–894.
- 3 M. Uberoi and C. J. Pereira, *Industrial & engineering chemistry research*, 1996, **35**, 113–116.
